# Supplementary material for: 3‐(1H‐Benzo[d]imidazol‐6‐yl)‐5‐(4‐fluorophenyl)‐1,2,4‐oxadiazole (DDO7232), a Novel Potent Nrf2/ARE Inducer, Ameliorates DSS‐Induced Murine Colitis and Protects NCM460 Cells against Oxidative Stress via ERK1/2 Phosphorylation
Source: Hindawi journal article supplement (doi:10.1155/2018/3271617), 2018-01-01

Supporting Information

**3-(1H-Benzo[d]imidazol-6-yl)-5-(4-fluorophenyl)-1,2,4-oxadiazole (DDO7232), a novel potent Nrf2/ARE inducer, ameliorates DSS-induced murine colitis and protects NCM460 cells against oxidative stress via ERK1/2 phosphorylation**

Li-Li Xu,<sup>a, b, c</sup> Tian Liu,<sup>a, b</sup> Lei Wang,<sup>a, b</sup> Li-Li,<sup>a, b</sup> Yu-Feng Wu,<sup>c</sup> Cui-Cui Li,<sup>c</sup> Bin Di,<sup>c</sup> Qi-Dong You,<sup>a, b\*</sup> Zheng-Yu Jiang,<sup>a, b\*</sup>

<sup>a</sup> State Key Laboratory of Natural Medicines and Jiangsu Key Laboratory of Drug Design and Optimization, China Pharmaceutical University, Nanjing, 210009, China

<sup>b</sup> Department of Medicinal Chemistry, School of Pharmacy, China Pharmaceutical University, Nanjing, 210009, China

<sup>c</sup> Key Laboratory on Protein Chemistry and Structural Biology, Key Laboratory of Drug Quality Control and Pharmacovigilance, Ministry of Education, China Pharmaceutical University, Nanjing 210009, China

## Table of Contents Graphic

$^1\text{H}$  NMR,  $^{13}\text{C}$  NMR spectra for representative target compounds.....S3-S4

**DDO7232: <sup>1</sup>H NMR, in DMSO, 300 MHz**

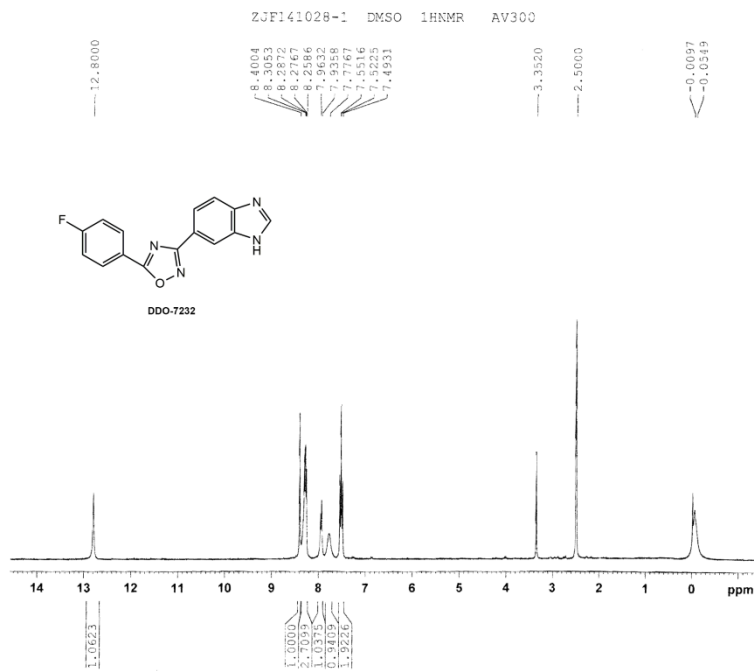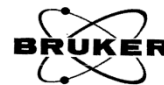

```

NAME      ZJF141028-1
EXPNO     1
PROCNO    1
Date_     20141028
Time      12.28
INSTRUM   spect
PROBHD    5 mm QNP 1H/
PULPROG   zgpg
TD         65536
SOLVENT   DMSO
NS         14
DS         4
SWH        7111.128 Hz
FIDRES     0.226079 Hz
AQ          2.713646 sec
RG          151
WDW         65.522 usec
DE          2.50 usec
TE          303.0 K
D1          1.50000000 sec
TD0         1
===== CHANNEL f1 =====
NUC1       1H
P1          13.75 usec
PL1         -1.00 dB
PL1W        12.34850073 W
SFO1       300.1370011 MHz
SF          300.1370011 MHz
WDW         EM
SSB         0
LB          0.30 Hz
GB          0
PC          0.95
    
```

**DDO7232: <sup>13</sup>C NMR, in DMSO, 75 MHz**

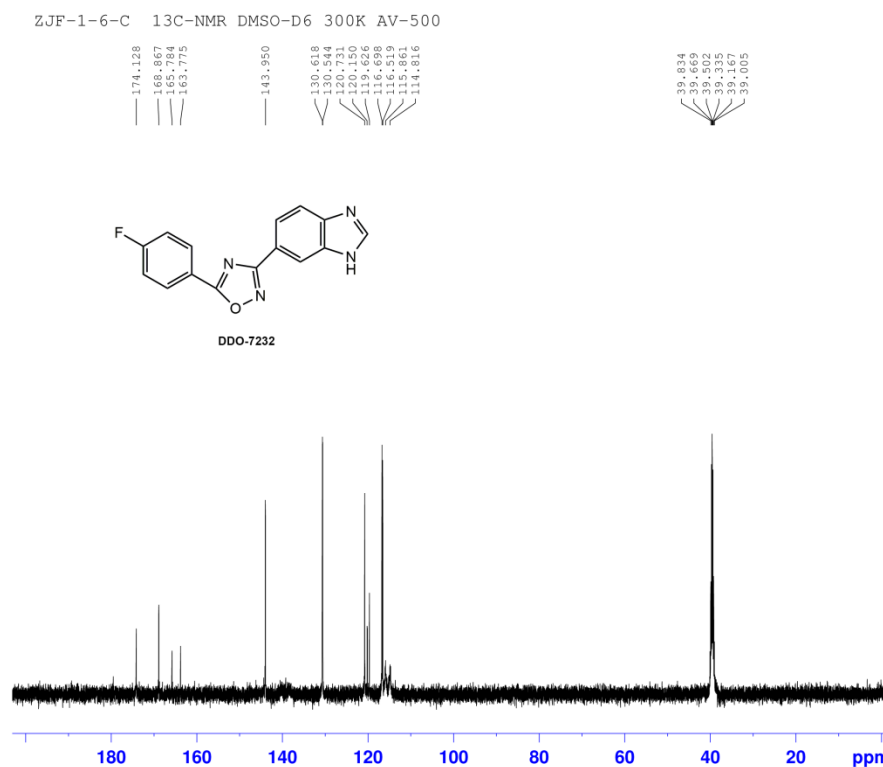

```

NAME      cdj1501
EXPNO     26
PROCNO    1
Date_     20110116
Time      1.08
INSTRUM   av500
PROBHD    5 mm QNP 1H/15
PULPROG   zgpg
TD         32768
SOLVENT   DMSO
NS         251
DS         4
SWH        30303.031 Hz
FIDRES     0.924775 Hz
AQ          0.5407385 sec
RG          32768
DW          16.500 usec
DE          6.50 usec
TE          303.0 K
D1          1.00000000 sec
D11        0.03000000 sec
TD0         1
===== CHANNEL f1 =====
NUC1       13C
P1          9.80 usec
PL1         2.00 dB
PL1W        54.99579239 W
SFO1       125.7722511 MHz
===== CHANNEL f2 =====
CPDPRG2   waltz16
NUC2       1H
PCPD2     80.00 usec
PL2        -1.50 dB
PL12       13.16 dB
PL2W       16.07304573 W
PL12W      0.54966515 W
SFO2       500.1320005 MHz
SI          32768
SF         125.7578579 MHz
WDW         EM
SSB         0
LB          0.50 Hz
GB          0
PC          1.40
    
```

2: <sup>1</sup>H NMR, in DMSO, 300 MHz

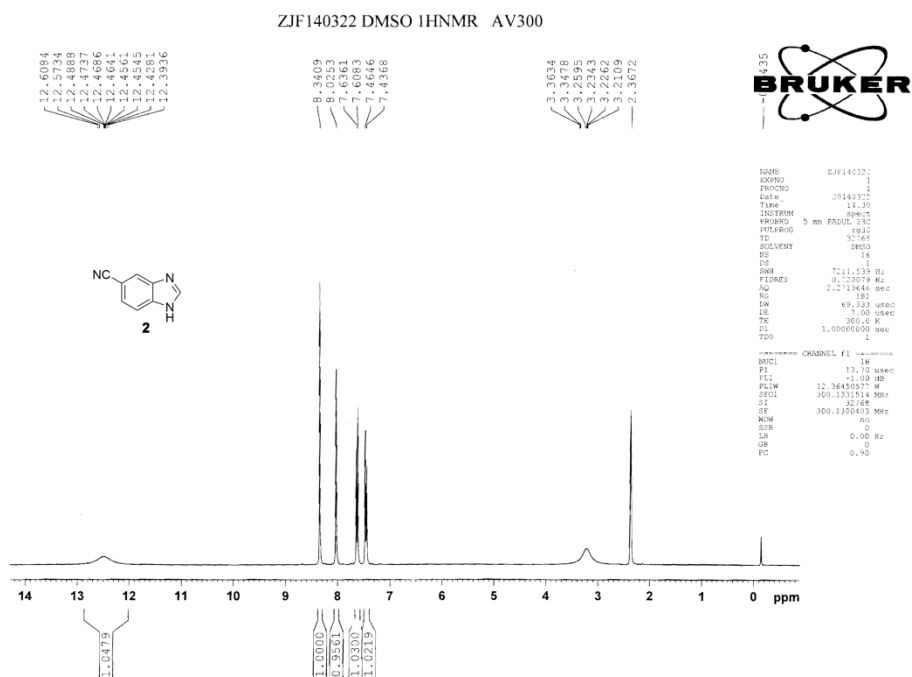

3: <sup>1</sup>H NMR, in DMSO, 300 MHz

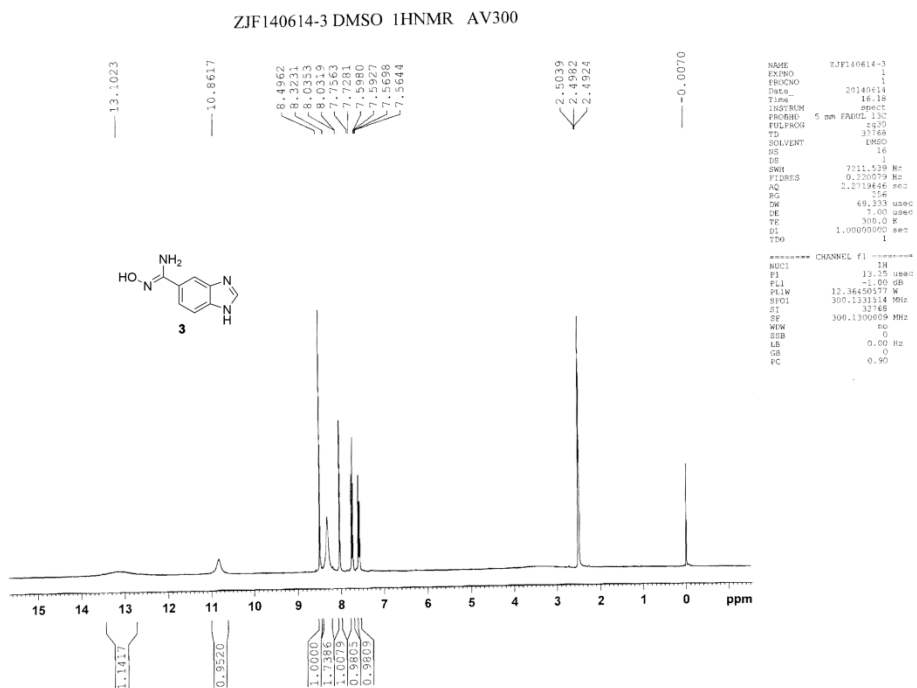

Supplement: f1 [file 3271617.f1.pdf]
